# Supplementary material
Source: MDPI journal article supplement (https://www.mdpi.com/2624-862X/2/4/47)
Supplement: s1 [file s1]

**Table S1.** Change in backscattered light per minute ( $\Delta$ BS) of whey protein isolate (WPI) in deionized water at 25 °C measured after 1 h across the vertical axis of a 40 mm cell. The samples are: fully dispersed WPI solution (WPI<sub>D</sub>), original control (WPI<sub>C</sub>) powder, WPI powder prepared without heat treatment (WPI<sub>UH</sub>), nanoparticulated powders prepared by heating (WPI<sub>H</sub>) or heated with calcium (WPI<sub>HCa</sub>) prior to drying.

| Cell Height | WPI <sub>D</sub> | WPI <sub>C</sub> | WPI <sub>UH</sub> | WPI <sub>H</sub> | WPI <sub>HCa</sub> |
|-------------|------------------|------------------|-------------------|------------------|--------------------|
| 0–10 mm     | 0.00 ± 0.00      | −0.09 ± 0.04     | −0.07 ± 0.03      | 0.01 ± 0.00      | −0.01 ± 0.01       |
| 11–20 mm    | 0.01 ± 0.00      | −0.09 ± 0.01     | −0.08 ± 0.01      | 0.00 ± 0.00      | −0.01 ± 0.00       |
| 21–30 mm    | 0.01 ± 0.00      | −0.10 ± 0.01     | −0.08 ± 0.01      | −0.01 ± 0.01     | −0.01 ± 0.00       |
| 31–40 mm    | 0.01 ± 0.00      | −0.15 ± 0.03     | −0.16 ± 0.14      | −0.03 ± 0.02     | 0.01 ± 0.03        |
